# Supplementary material for: Prevalence and Risk Factors of Chronic Kidney Disease among Type 2 Diabetes Patients: A Cross-Sectional Study in Primary Care Practice
Source: PubMed Central journal article supplement (PMC7148316; doi:10.1038/s41598-020-63443-4), 2020-04-10
Supplement: 41598_2020_63443_MOESM1_ESM.pdf [file 41598_2020_63443_MOESM1_ESM.pdf]

## Supplementary Information

### **Prevalence and Risk Factors of Chronic Kidney Disease among Type 2 Diabetes Patients: A Cross-Sectional Study in Primary Care Practice**

Janjira Jitraknatee, MD<sup>1</sup>, Chidchanok Ruengorn, PhD (ORCID iD: [orcid.org/0000-0001-7927-1425](https://orcid.org/0000-0001-7927-1425))<sup>2,3</sup>; Surapon Nochaiwong, PharmD (ORCID iD: [orcid.org/0000-0003-1100-7171](https://orcid.org/0000-0003-1100-7171))<sup>2,3\*</sup>

#### **Affiliations:**

<sup>1</sup>Kidney Center, Sansai Hospital, Chiang Mai 50290, Thailand

<sup>2</sup>Department of Pharmaceutical Care, Faculty of Pharmacy, Chiang Mai University, Chiang Mai 50200, Thailand

<sup>3</sup>Pharmacoepidemiology and Statistics Research Center (PESRC), Faculty of Pharmacy, Chiang Mai University, Chiang Mai 50200, Thailand

#### **\*Correspondence and requests for materials:**

Surapon Nochaiwong, PharmD, Department of Pharmaceutical Care, Faculty of Pharmacy, Chiang Mai University, Chiang Mai 50200, Thailand, Phone: 66899973365, Fax: 6653222741, Email: [surapon.nochaiwong@gmail.com](mailto:surapon.nochaiwong@gmail.com)

## Supplementary Online Content

|                    |                                                                                                                                             |     |
|--------------------|---------------------------------------------------------------------------------------------------------------------------------------------|-----|
| <b>Table S1</b>    | Univariable Risk Factors of CKD in Patients with T2DM                                                                                       | S3  |
| <b>Table S2</b>    | Study Equations for Estimating GFR Expressed                                                                                                | S7  |
| <b>Table S3</b>    | Agreement Between Study Equations Used to Diagnosed CKD (eGFR<60 mL/min/1.73 m <sup>2</sup> )                                               | S8  |
| <b>Table S4</b>    | Age-, Sex- and Glycaemic Control-Specific Prevalence of CKD in Patients with T2DM According to Study Equations for Estimating GFR Expressed | S9  |
| <b>Table S5</b>    | Sensitivity Analyses of Risk Factors of CKD in Patients with T2DM According to Equation for Estimating GFR Expressed                        | S12 |
| <b>Table S6</b>    | Sensitivity Analyses of Risk Factors of CKD in Patients with T2DM According to Type of analysis                                             | S13 |
| <b>Figure S1</b>   | Study Flow on the Selection of Eligible Patients                                                                                            | S14 |
| <b>Figure S2</b>   | Age, Sex and Glycaemic Control Adjusted Prevalence Rates of CKD in Patients with T2DM According to Equation for Estimating GFR Expressed    | S15 |
| <b>eReferences</b> |                                                                                                                                             | S17 |
| <b>Appendix</b>    | STROBE Statement                                                                                                                            | S18 |

**Table S1.** Univariable Risk Factors of CKD in Patients with T2DM

| <b>Factors</b>         | <b>Crude OR (95% CI)</b> | <b>P value</b> |
|------------------------|--------------------------|----------------|
| Sex                    |                          |                |
| Male                   | 1.00 (Reference)         |                |
| Female                 | 0.99 (0.75 – 1.31)       | 9.939          |
| Age, year              |                          |                |
| <55                    | 1.00 (Reference)         |                |
| 56-65                  | 3.01 (1.83 – 4.96)       | <0.001         |
| 66-75                  | 5.39 (3.22 – 9.04)       | <0.001         |
| >75                    | 18.12 (10.01 – 32.78)    | <0.001         |
| BMI, kg/m <sup>2</sup> |                          |                |
| <18.5                  | 0.64 (0.36 – 1.15)       | 0.138          |
| 18.5-22.9              | 1.00 (Reference)         |                |
| 23-24.9                | 0.89 (0.60 – 1.32)       | 0.578          |
| ≥25                    | 0.63 (0.46 – 0.87)       | 0.006          |
| Smoking status         |                          |                |
| Never                  | 1.00 (Reference)         |                |
| Former                 | 1.13 (0.54 – 2.36)       | 0.749          |
| Current                | 0.76 (0.44 – 1.30)       | 0.320          |
| Alcohol consumption    |                          |                |
| Never                  | 1.00 (Reference)         |                |
| Former                 | 0.76 (0.36 – 1.62)       | 0.484          |
| Current                | 0.65 (0.42 – 0.99)       | 0.044          |
| Insurance status       |                          |                |
| UCS by NHSO            | 1.00 (Reference)         |                |
| CSMBS                  | 0.97 (0.64 – 1.47)       | 0.886          |
| SSS/others             | 0.78 (0.50 – 1.21)       | 0.265          |
| Hypertension           |                          |                |
| No                     | 1.00 (Reference)         |                |
| Yes                    | 2.31 (1.51 – 3.53)       | <0.001         |
| CAD                    |                          |                |
| No                     | 1.00 (Reference)         |                |
| Yes                    | 3.01 (1.93 – 4.69)       | <0.001         |
| CBVD                   |                          |                |
| No                     | 1.00 (Reference)         |                |
| Yes                    | 2.54 (1.59 – 4.05)       | <0.001         |
| Retinopathy            |                          |                |
| No                     | 1.00 (Reference)         |                |
| Yes                    | 3.75 (2.63 – 5.35)       | <0.001         |
| Albuminuria            |                          |                |
| No                     | 1.00 (Reference)         |                |
| Yes                    | 2.59 (1.93 – 3.48)       | <0.001         |

Abbreviations: BMI, body mass index; CAD, coronary artery disease; CBVD, cerebrovascular disease; CI, confidence interval; CKD, chronic kidney disease; CSMBS, Civil Servant Medical Benefit Scheme; NHSO, National Health Security Office; OR, odds ratio; SSS, Social Security Scheme; T2DM, type 2 diabetes mellitus; UCS, Universal Coverage Scheme.

**Table S1.** Univariable Risk Factors of CKD in Patients with T2DM (Continued)

| <b>Factors</b>                     | <b>Crude OR (95% CI)</b> | <b>P value</b> |
|------------------------------------|--------------------------|----------------|
| Systolic BP, mmHg                  |                          |                |
| <140                               | 1.00 (Reference)         |                |
| ≥140                               | 1.35 (1.02 – 1.80)       | 0.038          |
| Diastolic BP, mmHg                 |                          |                |
| <90                                | 1.00 (Reference)         |                |
| ≥90                                | 0.82 (0.57 – 1.18)       | 0.290          |
| Long-standing diabetes (>10 years) |                          |                |
| No                                 | 1.00 (Reference)         |                |
| Yes                                | 2.02 (1.52 – 2.69)       | <0.001         |
| Fasting plasma glucose, mg/dL      |                          |                |
| <100                               | 1.00 (Reference)         |                |
| 100-125                            | 1.15 (0.69 – 1.92)       | 0.587          |
| ≥126                               | 0.86 (0.63 – 1.19)       | 0.376          |
| Haemoglobin A <sub>1c</sub> , %    |                          |                |
| <7                                 | 1.00 (Reference)         |                |
| ≥7                                 | 2.62 (1.89 – 3.62)       | <0.001         |
| Haemoglobin, g/dL                  |                          |                |
| ≥12 in females or ≥13 in males     | 1.00 (Reference)         |                |
| <12 in females or <13 in males     | 3.93 (2.94 – 5.26)       | <0.001         |
| Uric acid, mg/dL                   |                          |                |
| ≤7.5                               | 1.00 (Reference)         |                |
| >7.5                               | 7.80 (5.46 – 11.13)      | <0.001         |
| Total cholesterol, mg/dL           |                          |                |
| ≤200                               | 1.00 (Reference)         |                |
| >200                               | 0.95 (0.71 – 1.26)       | 0.705          |
| Triglycerides, mg/dL               |                          |                |
| ≤150                               | 1.00 (Reference)         |                |
| >150                               | 1.11 (0.84 – 1.47)       | 0.454          |
| LDL-C, mg/dL                       |                          |                |
| ≤100                               | 1.00 (Reference)         |                |
| >100                               | 1.18 (0.89 – 1.58)       | 0.254          |
| HDL-C, mg/dL                       |                          |                |
| ≥50 in females or ≥40 in males     | 1.00 (Reference)         |                |
| <50 in females or <40 in males     | 1.25 (0.94 – 1.65)       | 0.123          |
| Non-HDL-C, mg/dL                   |                          |                |
| ≤130                               | 1.00 (Reference)         |                |
| >130                               | 1.13 (0.84 – 1.51)       | 0.416          |

Abbreviations: BP, blood pressure; CI, confidence interval; CKD, chronic kidney disease; HDL-C, high density lipoprotein cholesterol; LDL-C, low density lipoprotein cholesterol; OR, odds ratio; T2DM, type 2 diabetes mellitus.

**Table S1.** Univariable Risk Factors of CKD in Patients with T2DM (Continued)

| <b>Factors</b>                                   | <b>Crude OR (95% CI)</b> | <b>P value</b> |
|--------------------------------------------------|--------------------------|----------------|
| <b>Glycaemic control</b>                         |                          |                |
| Diet only                                        | 1.00 (Reference)         |                |
| Metformin only                                   | 0.36 (0.21 – 0.61)       | <0.001         |
| Sulfonylurea only <sup>†</sup>                   | 1.73 (1.03 – 2.91)       | 0.038          |
| Metformin plus sulfonylurea                      | 0.32 (0.20 – 0.53)       | <0.001         |
| Other oral antidiabetic drugs <sup>‡</sup>       | 3.89 (0.34 – 44.34)      | 0.274          |
| Insulin only                                     | 1.99 (1.11 – 3.56)       | 0.020          |
| Insulin plus metformin                           | 0.26 (0.10 – 0.66)       | 0.005          |
| Insulin plus sulfonylurea                        | 1.58 (0.69 – 3.63)       | 0.281          |
| Insulin plus metformin plus sulfonylurea         | 0.38 (0.17 – 0.84)       | 0.016          |
| <b>ACEIs/ARBs</b>                                |                          |                |
| No                                               | 1.00 (Reference)         |                |
| Yes                                              | 0.88 (0.66 – 1.16)       | 0.359          |
| <b>Beta-blockers</b>                             |                          |                |
| No                                               | 1.00 (Reference)         |                |
| Yes                                              | 2.61 (1.83 – 3.74)       | <0.001         |
| <b>CCBs</b>                                      |                          |                |
| No                                               | 1.00 (Reference)         |                |
| Yes                                              | 1.16 (0.88 – 1.54)       | 0.298          |
| <b>Loop diuretic</b>                             |                          |                |
| No                                               | 1.00 (Reference)         |                |
| Yes                                              | 6.06 (3.78 – 9.71)       | <0.001         |
| <b>Thiazide</b>                                  |                          |                |
| No                                               | 1.00 (Reference)         |                |
| Yes                                              | 1.00 (0.57 – 1.72)       | 0.987          |
| <b>Other antihypertensive agents<sup>§</sup></b> |                          |                |
| No                                               | 1.00 (Reference)         |                |
| Yes                                              | 3.21 (1.86 – 5.55)       | <0.001         |
| <b>No. of antihypertensive therapy</b>           |                          |                |
| <3                                               | 1.00 (Reference)         |                |
| ≥3                                               | 2.81 (1.89 – 4.19)       | <0.001         |
| <b>Statins</b>                                   |                          |                |
| No                                               | 1.00 (Reference)         |                |
| Yes                                              | 1.15 (0.86 – 1.52)       | 0.339          |
| <b>Fibrates</b>                                  |                          |                |
| No                                               | 1.00 (Reference)         |                |
| Yes                                              | 0.98 (0.58 – 1.66)       | 0.946          |

<sup>†</sup>Includes glibenclamide, glipizide.

<sup>‡</sup>Includes pioglitazone only, metformin plus pioglitazone, metformin plus glipizide plus pioglitazone.

<sup>§</sup>Includes hydralazine, methylopa, doxazosin.

Abbreviations: ACEIs/ARBs, angiotensin-converting enzyme inhibitors/angiotensin II receptor blockers; CCBs, calcium channel blockers; CI, confidence interval; CKD, chronic kidney disease; T2DM, type 2 diabetes mellitus.

**Table S1.** Univariable Risk Factors of CKD in Patients with T2DM (Continued)

| <b>Factors</b>      | <b>Crude OR (95% CI)</b> | <b>P value</b> |
|---------------------|--------------------------|----------------|
| Antiplatelet agents |                          |                |
| No                  | 1.00 (Reference)         |                |
| Yes                 | 1.45 (1.10 – 1.92)       | 0.008          |
| Allopurinol         |                          |                |
| No                  | 1.00 (Reference)         |                |
| Yes                 | 2.45 (0.90 – 6.64)       | 0.079          |
| Colchicine          |                          |                |
| No                  | 1.00 (Reference)         |                |
| Yes                 | 2.95 (1.33 – 6.54)       | 0.008          |

Abbreviations: CI, confidence interval; CKD, chronic kidney disease; T2DM, type 2 diabetes mellitus.

**Table S2.** Study Equations for Estimating GFR Expressed

| <b>Sex</b>                                          | <b>Scr (mg/dL)</b> | <b>Equation<sup>†</sup></b>                                        |
|-----------------------------------------------------|--------------------|--------------------------------------------------------------------|
| <b>CKD-EPI Study Equation<sup>1</sup></b>           |                    |                                                                    |
| Female                                              | ≤0.7               | $GFR = 144 \times (Scr/0.7)^{-0.329} \times (0.993)^{Age}$         |
| Female                                              | >0.7               | $GFR = 144 \times (Scr/0.7)^{-1.209} \times (0.993)^{Age}$         |
| Male                                                | ≤0.9               | $GFR = 144 \times (Scr/0.9)^{-0.411} \times (0.993)^{Age}$         |
| Male                                                | >0.9               | $GFR = 144 \times (Scr/0.9)^{-1.209} \times (0.993)^{Age}$         |
| <b>CKD-EPI Study Equation for Asian<sup>2</sup></b> |                    |                                                                    |
| Female                                              | ≤0.7               | $GFR = 151 \times (Scr/0.7)^{-0.328} \times (0.993)^{Age}$         |
| Female                                              | >0.7               | $GFR = 151 \times (Scr/0.7)^{-1.210} \times (0.993)^{Age}$         |
| Male                                                | ≤0.9               | $GFR = 149 \times (Scr/0.9)^{-0.412} \times (0.993)^{Age}$         |
| Male                                                | >0.9               | $GFR = 149 \times (Scr/0.9)^{-1.210} \times (0.993)^{Age}$         |
| <b>MDRD Study Equation<sup>3</sup></b>              |                    |                                                                    |
| Female                                              | All                | $GFR = 175 \times Scr^{-1.154} \times Age^{-0.203} \times 0.742$   |
| Male                                                | All                | $GFR = 175 \times Scr^{-1.154} \times Age^{-0.203}$                |
| <b>Thai GFR Equation<sup>4</sup></b>                |                    |                                                                    |
| Female                                              | All                | $GFR = 375.5 \times Scr^{-0.848} \times Age^{-0.364} \times 0.712$ |
| Male                                                | All                | $GFR = 375.5 \times Scr^{-0.848} \times Age^{-0.364}$              |

<sup>†</sup>Conversion factors for units: GFR in mL/min/1.73 m<sup>2</sup> to mL/s/1.73 m<sup>2</sup>, ×0.0167; SCr in mg/dL to μmol/L, ×88.4.

Abbreviations: CKD-EPI, the Chronic Kidney Disease Epidemiology Collaboration; GFR, glomerular filtration rate; MDRD, the modification of diet in renal disease.

**Table S3.** Agreement Between Study Equations Used to Diagnosed CKD (eGFR<60 mL/min/1.73 m<sup>2</sup>)

| <b>eGFR Equation</b>       | <b>Kappa coefficient of Agreement with the CKD-EPI Equation (95% CI)</b> |
|----------------------------|--------------------------------------------------------------------------|
| CKD-EPI Equation for Asian | 0.93 (0.91-0.96)                                                         |
| MDRD Equation              | 0.90 (0.87-0.93)                                                         |
| Thai GFR Equation          | 0.87 (0.84-0.90)                                                         |

Abbreviations: CI, confidence interval; CKD, chronic kidney disease; CKD-EPI, the Chronic Kidney Disease Epidemiology Collaboration; eGFR, estimated glomerular filtration; MDRD, the modification of diet in renal disease.



**Table S4.** Age-, Sex- and Glycaemic Control-Specific Prevalence of CKD in Patients with T2DM According to Study Equations for Estimating GFR Expressed: CKD-EPI Equation for Asian

| Characteristics                                          | N            | Stage 3A   |                               | Stage 3B  |                               | Stage 4   |                               | Stage 5   |                               | Overall CKD |                               |
|----------------------------------------------------------|--------------|------------|-------------------------------|-----------|-------------------------------|-----------|-------------------------------|-----------|-------------------------------|-------------|-------------------------------|
|                                                          |              | Cases      | Prevalence Estimated (95% CI) | Cases     | Prevalence Estimated (95% CI) | Cases     | Prevalence Estimated (95% CI) | Cases     | Prevalence Estimated (95% CI) | Cases       | Prevalence Estimated (95% CI) |
| <b>Age, year</b>                                         |              |            |                               |           |                               |           |                               |           |                               |             |                               |
| <45                                                      | 68           | 1          | 1.5 (0.2-9.8)                 | 1         | 1.4 (0.2-9.8)                 | 1         | 1.5 (0.2-9.8)                 | 0         | 0.0                           | 3           | 4.4 (1.4-12.9)                |
| 45-55                                                    | 219          | 15         | 6.8 (4.2-11.1)                | 3         | 1.4 (0.4-4.2)                 | 1         | 0.4 (0.1-3.2)                 | 3         | 1.4 (0.4-4.2)                 | 22          | 10.0 (6.7-14.8)               |
| 56-65                                                    | 439          | 30         | 6.8 (4.8-9.6)                 | 25        | 5.7 (3.9-8.3)                 | 16        | 3.6 (2.2-5.9)                 | 8         | 1.8 (0.9-3.6)                 | 79          | 18.0 (14.7-21.9)              |
| 66-75                                                    | 262          | 35         | 13.4 (9.7-18.0)               | 23        | 8.8 (5.9-12.9)                | 15        | 5.7 (3.5-9.3)                 | 5         | 1.9 (0.8-4.5)                 | 78          | 29.8 (24.5-35.6)              |
| >75                                                      | 106          | 28         | 26.4 (18.9-35.6)              | 21        | 19.8 (13.2-28.5)              | 9         | 8.5 (4.4-15.6)                | 1         | 0.9 (0.1-6.4)                 | 59          | 55.7 (46.0-64.9)              |
| <b>Sex</b>                                               |              |            |                               |           |                               |           |                               |           |                               |             |                               |
| Male                                                     | 469          |            | 9.8 (7.4-12.8)                | 33        | 7.0 (5.0-9.7)                 | 14        | 3.0 (1.8-5.0)                 | 6         | 1.3 (0.6-2.8)                 | 99          | 21.1 (17.6-25.0)              |
| Female                                                   | 625          |            | 10.1 (7.9-12.7)               | 40        | 6.4 (4.7-8.6)                 | 28        | 4.5 (3.1-6.4)                 | 11        | 1.8 (1.0-3.2)                 | 142         | 22.7 (19.6-26.2)              |
| <b>Glycaemic control, haemoglobin A<sub>1c</sub> (%)</b> |              |            |                               |           |                               |           |                               |           |                               |             |                               |
| <6                                                       | 103          | 7          | 6.8 (3.2-13.6)                | 7         | 6.8 (3.2-13.6)                | 4         | 3.9 (1.4-9.9)                 | 2         | 1.9 (0.5-7.5)                 | 20          | 19.4 (12.8-28.2)              |
| 6-6.9                                                    | 292          | 21         | 7.2 (4.7-10.8)                | 6         | 2.0 (0.9-4.5)                 | 2         | 0.7 (0.2-2.7)                 | 3         | 1.0 (0.3-3.1)                 | 32          | 11.0 (7.8-15.1)               |
| 7-7.9                                                    | 241          | 16         | 6.6 (4.1-10.6)                | 8         | 3.3 (1.7-6.5)                 | 6         | 2.5 (1.1-5.4)                 | 1         | 0.4 (0.1-2.9)                 | 31          | 12.9 (9.2-17.7)               |
| ≥8                                                       | 458          | 65         | 14.2 (11.3-17.7)              | 52        | 11.4 (8.8-14.6)               | 30        | 6.6 (4.6-9.2)                 | 11        | 2.4 (1.3-4.3)                 | 158         | 34.5 (30.3-39.0)              |
| <b>All</b>                                               | <b>1,094</b> | <b>109</b> | <b>10.0 (8.3-11.9)</b>        | <b>71</b> | <b>6.7 (5.3-8.3)</b>          | <b>42</b> | <b>3.8 (0.3-5.2)</b>          | <b>17</b> | <b>1.6 (1.0-2.5)</b>          | <b>241</b>  | <b>22.0 (19.7-24.6)</b>       |

Abbreviations: CI, confidence interval; CKD, chronic kidney disease; CKD-EPI, the Chronic Kidney Disease Epidemiology Collaboration; GFR, glomerular filtration rate; T2DM, type 2 diabetes mellitus.

**Table S4.** Age-, Sex- and Glycaemic Control-Specific Prevalence of CKD in Patients with T2DM According to Study Equations for Estimating GFR Expressed: MDRD Equation (Continued)

| Characteristics                                          | N            | Stage 3A   |                               | Stage 3B  |                               | Stage 4   |                               | Stage 5   |                               | Overall CKD |                               |
|----------------------------------------------------------|--------------|------------|-------------------------------|-----------|-------------------------------|-----------|-------------------------------|-----------|-------------------------------|-------------|-------------------------------|
|                                                          |              | Cases      | Prevalence Estimated (95% CI) | Cases     | Prevalence Estimated (95% CI) | Cases     | Prevalence Estimated (95% CI) | Cases     | Prevalence Estimated (95% CI) | Cases       | Prevalence Estimated (95% CI) |
| <b>Age, year</b>                                         |              |            |                               |           |                               |           |                               |           |                               |             |                               |
| <45                                                      | 68           | 0          | 0.0                           | 2         | 2.9 (0.7-11.1)                | 1         | 1.5 (0.2-9.8)                 | 0         | 0.0                           | 3           | 4.4 (1.4-12.9)                |
| 45-55                                                    | 219          | 16         | 7.3 (4.5-11.6)                | 11        | 5.8 (2.8-8.8)                 | 1         | 0.4 (0.1-3.2)                 | 3         | 1.4 (0.4-4.2)                 | 31          | 14.2 (10.1-19.4)              |
| 56-65                                                    | 439          | 54         | 12.3 (9.5-15.7)               | 31        | 7.1 (5.0-9.9)                 | 17        | 3.9 (2.4-6.1)                 | 10        | 2.2 (1.2-4.2)                 | 112         | 25.5 (21.6-29.8)              |
| 66-75                                                    | 262          | 47         | 17.9 (13.7-23.1)              | 25        | 9.5 (6.5-13.8)                | 18        | 6.9 (4.4-10.6)                | 5         | 1.9 (0.8-4.5)                 | 95          | 36.2 (30.6-42.3)              |
| >75                                                      | 106          | 30         | 28.3 (20.5-37.6)              | 21        | 19.8 (13.2-28.5)              | 11        | 10.4 (5.8-17.8)               | 0         | 0.0                           | 62          | 58.5 (48.8-67.5)              |
| <b>Sex</b>                                               |              |            |                               |           |                               |           |                               |           |                               |             |                               |
| Male                                                     | 469          | 65         | 13.8 (11.0-17.3)              | 38        | 8.1 (5.9-10.9)                | 18        | 3.8 (2.4-6.0)                 | 6         | 1.3 (0.6-2.8)                 | 127         | 27.1 (23.2-31.3)              |
| Female                                                   | 625          | 82         | 13.1 (10.7-16.0)              | 52        | 8.3 (6.4-10.8)                | 30        | 4.8 (3.4-6.8)                 | 12        | 1.9 (1.1-3.4)                 | 176         | 28.2 (24.8-31.8)              |
| <b>Glycaemic control, haemoglobin A<sub>1c</sub> (%)</b> |              |            |                               |           |                               |           |                               |           |                               |             |                               |
| <6                                                       | 103          | 10         | 9.7 (5.3-17.2)                | 6         | 5.8 (2.6-12.4)                | 6         | 5.8 (2.6-12.4)                | 1         | 1.0 (0.1-6.6)                 | 23          | 22.3 (15.3-31.4)              |
| 6-6.9                                                    | 292          | 35         | 12.0 (8.7-16.2)               | 10        | 3.4 (1.8-6.2)                 | 2         | 0.7 (0.2-2.7)                 | 3         | 1.0 (0.3-3.1)                 | 50          | 17.1 (13.2-21.9)              |
| 7-7.9                                                    | 241          | 24         | 10.0 (6.8-14.4)               | 9         | 3.7 (2.0-7.0)                 | 8         | 3.3 (1.7-6.5)                 | 1         | 0.4 (0.1-2.9)                 | 42          | 17.4 (13.1-22.8)              |
| ≥8                                                       | 458          | 78         | 17.0 (13.8-20.8)              | 65        | 14.2 (11.3-17.7)              | 32        | 7.0 (5.0-9.7)                 | 13        | 2.8 (1.6-4.8)                 | 188         | 41.0 (36.6-45.6)              |
| <b>All</b>                                               | <b>1,094</b> | <b>147</b> | <b>13.4 (11.5-15.6)</b>       | <b>90</b> | <b>8.2 (6.7-10.0)</b>         | <b>48</b> | <b>4.4 (3.3-5.8)</b>          | <b>18</b> | <b>1.6 (1.0-2.6)</b>          | <b>303</b>  | <b>27.7 (25.1-30.4)</b>       |

Abbreviations: CI, confidence interval; CKD, chronic kidney disease; GFR, glomerular filtration rate; MDRD, the modification of diet in renal disease; T2DM, type 2 diabetes mellitus.

**Table S4.** Age-, Sex- and Glycaemic Control-Specific Prevalence of CKD in Patients with T2DM According to Study Equations for Estimating GFR Expressed: Thai GFR Equation (Continued)

| Characteristics                                          | N            | Stage 3A   |                               | Stage 3B  |                               | Stage 4   |                               | Stage 5  |                               | Overall CKD |                               |
|----------------------------------------------------------|--------------|------------|-------------------------------|-----------|-------------------------------|-----------|-------------------------------|----------|-------------------------------|-------------|-------------------------------|
|                                                          |              | Cases      | Prevalence Estimated (95% CI) | Cases     | Prevalence Estimated (95% CI) | Cases     | Prevalence Estimated (95% CI) | Cases    | Prevalence Estimated (95% CI) | Cases       | Prevalence Estimated (95% CI) |
| <b>Age, year</b>                                         |              |            |                               |           |                               |           |                               |          |                               |             |                               |
| <45                                                      | 68           | 1          | 1.5 (0.2-9.8)                 | 1         | 1.5 (0.2-9.8)                 | 0         | 0.0                           | 0        | 0.0                           | 2           | 2.9 (0.7-11.1)                |
| 45-55                                                    | 219          | 14         | 6.4 (3.8-10.5)                | 1         | 0.4 (0.1-3.2)                 | 3         | 1.4 (0.4-4.2)                 | 1        | 0.4 (0.1-3.2)                 | 19          | 8.7 (5.6-13.2)                |
| 56-65                                                    | 439          | 45         | 10.2 (7.7-13.5)               | 24        | 5.5 (3.7-8.0)                 | 9         | 2.0 (1.1-3.9)                 | 4        | 0.9 (0.3-2.4)                 | 82          | 18.7 (15.3-22.6)              |
| 66-75                                                    | 262          | 40         | 15.3 (11.4-20.2)              | 24        | 9.2 (6.2-13.3)                | 9         | 3.4 (1.8-6.5)                 | 2        | 0.8 (0.2-3.0)                 | 75          | 28.6 (23.5-34.4)              |
| >75                                                      | 106          | 30         | 28.3 (20.5-37.6)              | 25        | 23.6 (16.4-32.6)              | 1         | 0.9 (0.1-6.4)                 | 0        | 0.0                           | 56          | 52.8 (43.3-62.2)              |
| <b>Sex</b>                                               |              |            |                               |           |                               |           |                               |          |                               |             |                               |
| Male                                                     | 469          | 44         | 9.4 (7.0-12.4)                | 23        | 4.9 (3.3-7.3)                 | 4         | 0.8 (0.3-2.2)                 | 2        | 0.4 (0.1-1.7)                 | 73          | 15.6 (12.6-19.1)              |
| Female                                                   | 625          | 86         | 13.8 (11.3-16.7)              | 52        | 8.3 (6.4-10.8)                | 18        | 2.9 (1.8-4.5)                 | 5        | 0.8 (0.3-1.9)                 | 161         | 25.8 (22.5-29.3)              |
| <b>Glycaemic control, haemoglobin A<sub>1c</sub> (%)</b> |              |            |                               |           |                               |           |                               |          |                               |             |                               |
| <6                                                       | 103          | 27         | 10.7 (6.0-18.3)               | 4         | 4.8 (2.0-11.2)                | 2         | 2.9 (0.9-8.7)                 | 1        | 1.0 (0.1-6.6)                 | 20          | 19.4 (12.8-28.2)              |
| 6-6.9                                                    | 292          | 11         | 9.2 (6.4-13.2)                | 5         | 1.4 (0.5-3.6)                 | 3         | 0.7 (0.2-2.7)                 | 1        | 0.3 (0.0-2.4)                 | 34          | 11.6 (8.4-15.9)               |
| 7-7.9                                                    | 241          | 16         | 6.6 (4.1-10.6)                | 10        | 4.1 (2.2-7.6)                 | 2         | 0.8 (0.2-3.3)                 | 0        | 0.0                           | 28          | 11.6 (8.1-16.3)               |
| ≥8                                                       | 458          | 76         | 16.6 (13.4-20.3)              | 56        | 12.2 (9.5-15.6)               | 15        | 3.3 (2.0-5.4)                 | 5        | 1.1 (0.4-2.6)                 | 152         | 33.2 (29.0-37.6)              |
| <b>All</b>                                               | <b>1,094</b> | <b>130</b> | <b>11.9 (10.1-13.9)</b>       | <b>75</b> | <b>6.8 (5.5-8.5)</b>          | <b>22</b> | <b>2.0 (1.3-3.0)</b>          | <b>7</b> | <b>0.6 (0.3-1.3)</b>          | <b>234</b>  | <b>21.4 (19.0-23.9)</b>       |

Abbreviations: CI, confidence interval; CKD, chronic kidney disease; GFR, glomerular filtration rate; T2DM, type 2 diabetes mellitus.

**Table S5.** Sensitivity Analyses of Risk Factors of CKD in Patients with T2DM According to Equation for Estimating GFR Expressed (n=1,061)

| Factors                         | CKD-EPI Equation <sup>1</sup> |         | CKD-EPI Equation for Asian <sup>2</sup> |         | MDRD Equation <sup>3</sup> |         | Thai GFR Equation <sup>4</sup> |         |
|---------------------------------|-------------------------------|---------|-----------------------------------------|---------|----------------------------|---------|--------------------------------|---------|
|                                 | Adjusted OR (95% CI)          | P Value | Adjusted OR (95% CI)                    | P Value | Adjusted OR (95% CI)       | P Value | Adjusted OR (95% CI)           | P Value |
| Age, year                       |                               |         |                                         |         |                            |         |                                |         |
| <55                             | 1.00 (Reference)              |         | 1.00 (Reference)                        |         | 1.00 (Reference)           |         | 1.00 (Reference)               |         |
| 56-65                           | 2.80 (1.59 – 4.93)            | <0.001  | 2.23 (1.26 – 3.97)                      | 0.006   | 2.62 (1.58 – 4.34)         | <0.001  | 3.02 (1.65 – 5.52)             | <0.001  |
| 66-75                           | 5.41 (2.97 – 9.88)            | <0.001  | 4.63 (2.53 – 8.48)                      | <0.001  | 4.54 (2.64 – 7.80)         | <0.001  | 5.26 (2.80 – 9.88)             | <0.001  |
| >75                             | 27.44 (13.51 – 55.73)         | <0.001  | 19.33 (9.62 – 38.84)                    | <0.001  | 14.21 (7.46 – 27.01)       | <0.001  | 18.84 (9.24 – 38.42)           | <0.001  |
| Retinopathy                     |                               |         |                                         |         |                            |         |                                |         |
| No                              | 1.00 (Reference)              |         | 1.00 (Reference)                        |         | 1.00 (Reference)           |         | 1.00 (Reference)               |         |
| Yes                             | 3.41 (2.18 – 5.34)            | <0.001  | 3.40 (2.17 – 5.32)                      | <0.001  | 3.14 (2.04 – 4.82)         | <0.001  | 2.77 (1.78 – 4.31)             | <0.001  |
| Albuminuria                     |                               |         |                                         |         |                            |         |                                |         |
| No                              | 1.00 (Reference)              |         | 1.00 (Reference)                        |         | 1.00 (Reference)           |         | 1.00 (Reference)               |         |
| Yes                             | 2.08 (1.43 – 3.02)            | <0.001  | 2.33 (1.58 – 3.42)                      | <0.001  | 1.93 (1.38 – 2.72)         | <0.001  | 2.27 (1.55 – 3.31)             | <0.001  |
| Haemoglobin A <sub>1c</sub> , % |                               |         |                                         |         |                            |         |                                |         |
| <7                              | 1.00 (Reference)              |         | 1.00 (Reference)                        |         | 1.00 (Reference)           |         | 1.00 (Reference)               |         |
| ≥7                              | 3.32 (2.20 – 5.01)            | <0.001  | 2.81 (1.86 – 4.26)                      | <0.001  | 2.49 (1.72 – 3.59)         | <0.001  | 2.31 (1.55 – 3.45)             | <0.001  |
| Haemoglobin, g/dL               |                               |         |                                         |         |                            |         |                                |         |
| ≥12 (F) or ≥13 (M)              | 1.00 (Reference)              |         | 1.00 (Reference)                        |         | 1.00 (Reference)           |         | 1.00 (Reference)               |         |
| <12 (F) or <13 (M)              | 2.96 (2.07 – 4.23)            | <0.001  | 2.95 (2.05 – 4.23)                      | <0.001  | 2.67 (1.92 – 3.71)         | <0.001  | 3.00 (2.10 – 4.27)             | <0.001  |
| Uric acid, mg/dL                |                               |         |                                         |         |                            |         |                                |         |
| ≤7.5                            | 1.00 (Reference)              |         | 1.00 (Reference)                        |         | 1.00 (Reference)           |         | 1.00 (Reference)               |         |
| >7.5                            | 9.00 (5.82 – 13.92)           | <0.001  | 7.55 (4.93 – 11.57)                     | <0.001  | 8.26 (5.43 – 12.56)        | <0.001  | 5.56 (3.67 – 8.41)             | <0.001  |
| C statistic (95% CI)            | 0.87 (0.85 – 0.90)            |         | 0.87 (0.85 – 0.90)                      |         | 0.87 (0.85 – 0.89)         |         | 0.87 (0.85 – 0.89)             |         |

Abbreviations: CI, confidence interval; CKD, chronic kidney disease; CKD-EPI, the Chronic Kidney Disease Epidemiology Collaboration; F, female; GFR, glomerular filtration rate; M, male; MDRD, the modification of diet in renal disease; OR, Odds ratio; T2DM, type 2 diabetes mellitus.

**Table S6.** Sensitivity Analyses of Risk Factors of CKD in Patients with T2DM According to Type of analysis

| Factors                         | Primary Analysis<br>(n=1,061) |         | Multiple Imputation Analysis<br>(n=1,094) |         | Excluding Patients with<br>Hyperfiltration (n=1,038) <sup>†</sup> |         |
|---------------------------------|-------------------------------|---------|-------------------------------------------|---------|-------------------------------------------------------------------|---------|
|                                 | Adjusted OR (95% CI)          | P Value | Adjusted OR (95% CI)                      | P Value | Adjusted OR (95% CI)                                              | P Value |
| Age, year                       |                               |         |                                           |         |                                                                   |         |
| <55                             | 1.00 (Reference)              |         | 1.00 (Reference)                          |         | 1.00 (Reference)                                                  |         |
| 56-65                           | 2.80 (1.59 – 4.93)            | <0.001  | 3.05 (1.73 – 5.37)                        | <0.001  | 2.59 (1.46 – 4.58)                                                | 0.001   |
| 66-75                           | 5.41 (2.97 – 9.88)            | <0.001  | 5.76 (3.15 – 10.51)                       | <0.001  | 4.99 (2.73 – 9.15)                                                | <0.001  |
| >75                             | 27.44 (13.51 – 55.73)         | <0.001  | 27.75 (13.78 – 55.91)                     | <0.001  | 25.24 (12.39 – 51.45)                                             | <0.001  |
| Retinopathy                     |                               |         |                                           |         |                                                                   |         |
| No                              | 1.00 (Reference)              |         | 1.00 (Reference)                          |         | 1.00 (Reference)                                                  |         |
| Yes                             | 3.41 (2.18 – 5.34)            | <0.001  | 3.51 (2.26 – 5.48)                        | <0.001  | 3.35 (2.14 – 5.24)                                                | <0.001  |
| Albuminuria                     |                               |         |                                           |         |                                                                   |         |
| No                              | 1.00 (Reference)              |         | 1.00 (Reference)                          |         | 1.00 (Reference)                                                  |         |
| Yes                             | 2.08 (1.43 – 3.02)            | <0.001  | 2.08 (1.44 – 3.01)                        | <0.001  | 2.09 (1.44 – 3.04)                                                | <0.001  |
| Haemoglobin A <sub>1c</sub> , % |                               |         |                                           |         |                                                                   |         |
| <7                              | 1.00 (Reference)              |         | 1.00 (Reference)                          |         | 1.00 (Reference)                                                  |         |
| ≥7                              | 3.32 (2.20 – 5.01)            | <0.001  | 3.35 (2.23 – 5.04)                        | <0.001  | 3.33 (2.20 – 5.02)                                                | <0.001  |
| Haemoglobin, g/dL               |                               |         |                                           |         |                                                                   |         |
| ≥12 (F) or ≥13 (M)              | 1.00 (Reference)              |         | 1.00 (Reference)                          |         | 1.00 (Reference)                                                  |         |
| <12 (F) or <13 (M)              | 2.96 (2.07 – 4.23)            | <0.001  | 2.94 (2.07 – 4.18)                        | <0.001  | 2.93 (2.05 – 4.18)                                                | <0.001  |
| Uric acid, mg/dL                |                               |         |                                           |         |                                                                   |         |
| ≤7.5                            | 1.00 (Reference)              |         | 1.00 (Reference)                          |         | 1.00 (Reference)                                                  |         |
| >7.5                            | 9.00 (5.82 – 13.92)           | <0.001  | 8.99 (5.80 – 13.93)                       | <0.001  | 8.99 (5.81 – 13.92)                                               | <0.001  |
| C statistic (95% CI)            | 0.87 (0.85 – 0.90)            |         | 0.88 (0.86 – 0.90)                        |         | 0.87 (0.85 – 0.90)                                                |         |

<sup>†</sup>GFR ≥120 mL/min/1.73m<sup>2</sup>

Abbreviations: CI, confidence interval; CKD, chronic kidney disease; CKD-EPI, the Chronic Kidney Disease Epidemiology Collaboration; F, female; eGFR, glomerular filtration rate; M, male; MDRD, the modification of diet in renal disease; OR, Odds ratio; T2DM, type 2 diabetes mellitus.

**Figure S1.** Study Flow on the Selection of Eligible Patients

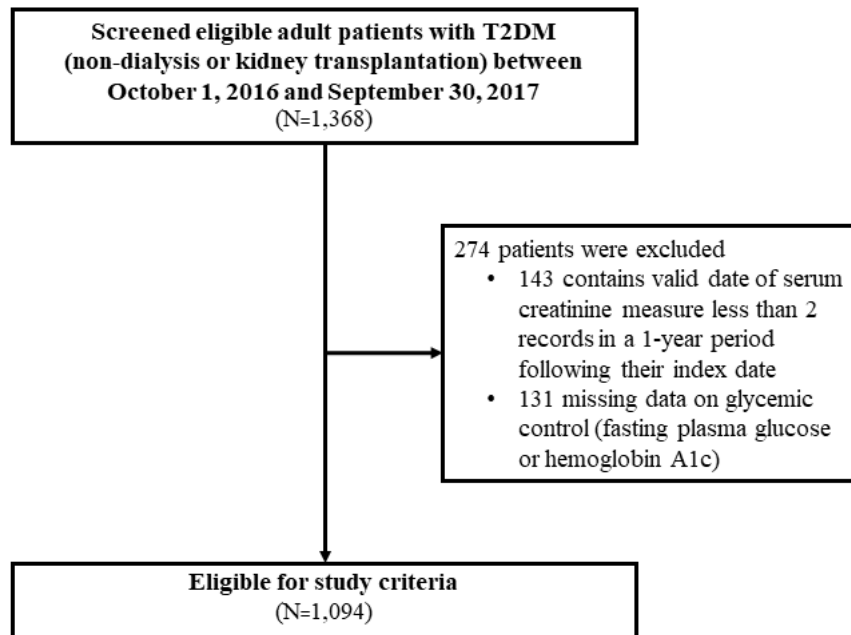

Abbreviations: T2DM, type 2 diabetes mellitus.

**Figure S2.** Age, Sex and Glycaemic Control Adjusted Prevalence Rates of CKD in Patients with T2DM According to Equation for Estimating GFR Expressed

**A: CKD-EPI Equation for Asian**

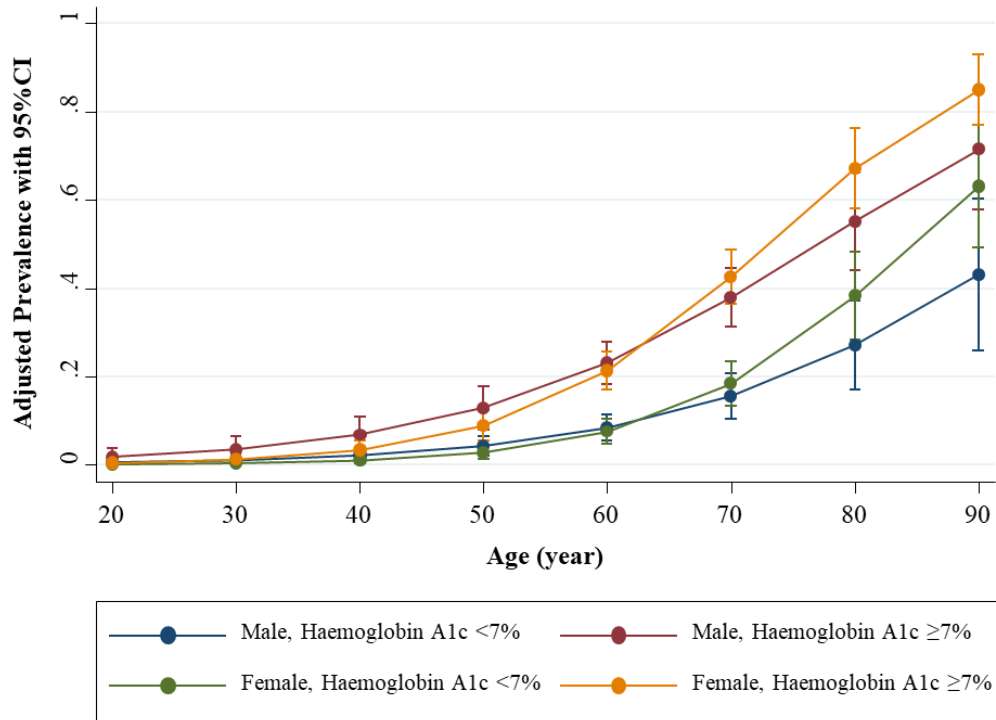

**B: MDRD Equation**

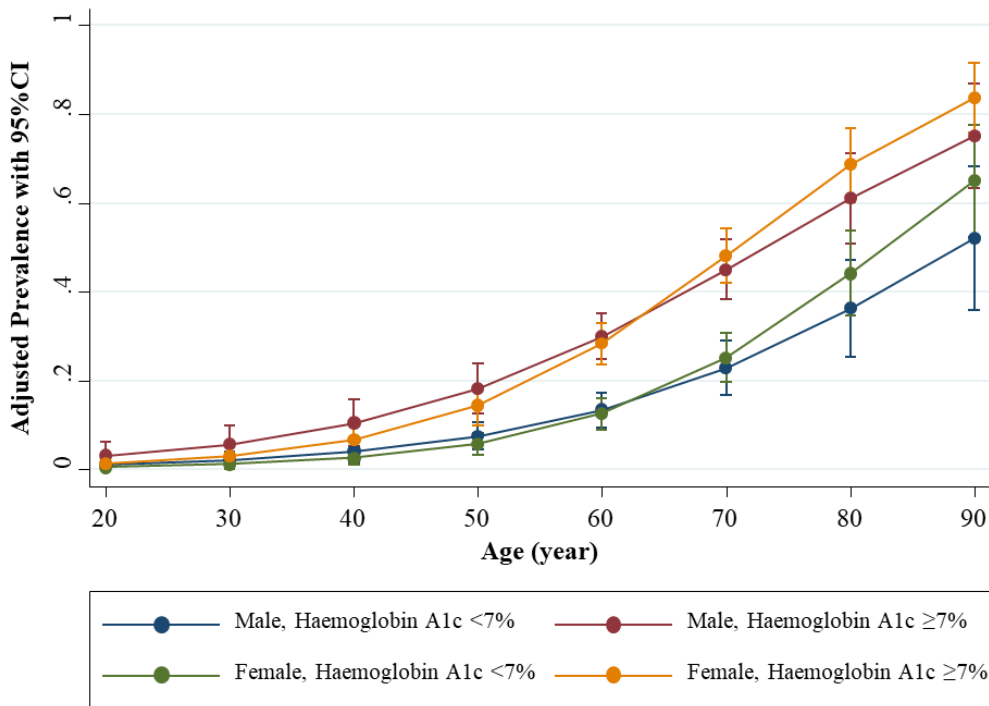

Abbreviations: CI, confidence interval; CKD, chronic kidney disease; CKD-EPI, the Chronic Kidney Disease Epidemiology Collaboration; eGFR, glomerular filtration rate; MDRD, the modification of diet in renal disease; T2DM, type 2 diabetes mellitus.

**Figure S2.** Age, Sex and Glycaemic Control Adjusted Prevalence Rates of CKD in Patients with T2DM According to Equation for Estimating GFR Expressed (Continued)

**C: Thai GFR Equation**

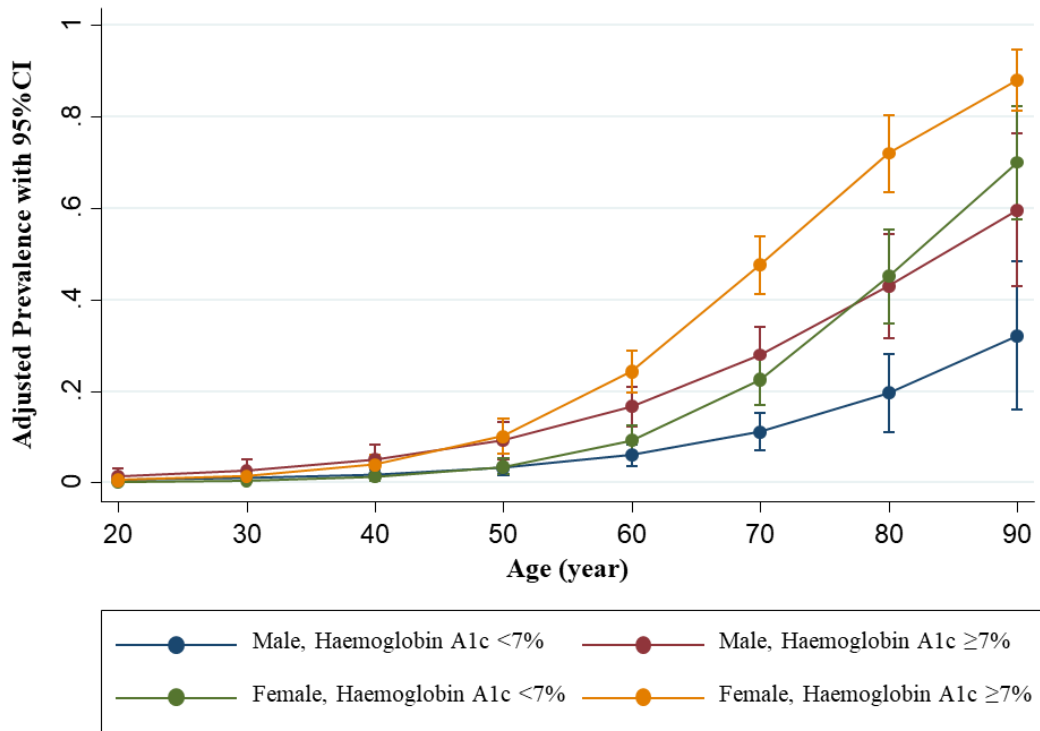

Abbreviations: CI, confidence interval; CKD, chronic kidney disease; CKD-EPI, the Chronic Kidney Disease Epidemiology Collaboration; eGFR, glomerular filtration rate; MDRD, the modification of diet in renal disease; T2DM, type 2 diabetes mellitus.



## eReferences

1. Levey AS, Stevens LA, Schmid CH, Zhang YL, Castro AF 3rd, Feldman HI, et al; CKD-EPI (Chronic Kidney Disease Epidemiology Collaboration). A new equation to estimate glomerular filtration rate. *Ann Intern Med.* 2009;150(9):604-12.
2. Stevens LA, Claybon MA, Schmid CH, Chen J, Horio M, Imai E, et al. Evaluation of the Chronic Kidney Disease Epidemiology Collaboration equation for estimating the glomerular filtration rate in multiple ethnicities. *Kidney Int.* 2011;79(5):555-62.
3. Stevens LA, Coresh J, Feldman HI, Greene T, Lash JP, Nelson RG, et al. Evaluation of the modification of diet in renal disease study equation in a large diverse population. *J Am Soc Nephrol.* 2007;18(10):2749-57.
4. Praditpornsilpa K, Townamchai N, Chaiwatanarat T, Tiranathanagul K, Katawatin P, Susantitaphong P, et al. The need for robust validation for MDRD-based glomerular filtration rate estimation in various CKD populations. *Nephrol Dial Transplant.* 2011;26(9):2780-5.

**Appendix.** STROBE Statement—Checklist of items that Should be included in reports of *cross-sectional studies*

|                           | <b>Item No</b> | <b>Recommendation</b>                                                                                                                                                                             | <b>Page#</b> |
|---------------------------|----------------|---------------------------------------------------------------------------------------------------------------------------------------------------------------------------------------------------|--------------|
| <b>Title and abstract</b> | 1              | (a) Indicate the study’s design with a commonly used term in the title or the abstract                                                                                                            | 1            |
|                           |                | (b) Provide in the abstract on informative and balanced summary of what was done and what was found                                                                                               | 3            |
| <b>Introduction</b>       |                |                                                                                                                                                                                                   |              |
| Background/rational       | 2              | Explain the scientific background and rationale for the investigation being reported                                                                                                              | 4, 5         |
| Objectives                | 3              | State specific objectives, including any prespecified hypotheses                                                                                                                                  | 5            |
| <b>Methods</b>            |                |                                                                                                                                                                                                   |              |
| Study design              | 4              | Present key elements of study design early in the paper                                                                                                                                           | 13           |
| Setting                   | 5              | Describe the setting, locations, and relevant dates, including periods of recruitment, exposure, follow-up, and data collection                                                                   | 13           |
| Participants              | 6              | (a) Give the eligibility criteria, and the sources and methods of selection of participants                                                                                                       | 14           |
| Variables                 | 7              | Clearly define all outcomes, exposures, predictors, potential confounders, and effect modifiers. Give diagnostic criteria, if applicable                                                          | 14, 15       |
| Data sources/measurement  | 8*             | For each variable of interest, give sources of data and details of methods of assessment (measurement). Describe comparability of assessment methods if there is more than one group              | 13           |
| Bias                      | 9              | Describe any efforts to address potential sources of bias                                                                                                                                         | 14, 15       |
| Study size                | 10             | Explain how the study size was arrived at                                                                                                                                                         | 15           |
| Quantitative variables    | 11             | Explain how quantitative variables were handled in the analyses. If applicable, describe which groupings were chosen and why                                                                      | 15, 16       |
| Statistical methods       | 12             | (a) Describe all statistical methods, including those used to control for confounding                                                                                                             | 15, 16       |
|                           |                | (b) Describe any methods used to examine subgroups and interactions                                                                                                                               | NA           |
|                           |                | (c) Explain how missing data were addressed                                                                                                                                                       | 16           |
|                           |                | (d) if applicable, describe analytical methods taking account of sampling strategy                                                                                                                | NA           |
|                           |                | (e) Describe any sensitivity analyses                                                                                                                                                             | 16, 17       |
| <b>Results</b>            |                |                                                                                                                                                                                                   |              |
| Participants              | 13*            | (a) Report numbers of individuals at each stage of study—eg numbers potentially eligible, examined for eligibility, confirmed eligible, included in the study, completing follow-up, and analyzed | 6            |
|                           |                | (b) Indicate number of participants with missing data for each variable of interest                                                                                                               | 6, Table: 1  |
|                           |                | (c) Consider use of a flow diagram                                                                                                                                                                | Figure S1    |

**Appendix. STROBE Statement—Checklist of items that Should be included in reports of *cross-sectional studies* (Continued)**

|                          | <b>Item No</b> | <b>Recommendation</b>                                                                                                                                                                                       | <b>Page#</b>                 |
|--------------------------|----------------|-------------------------------------------------------------------------------------------------------------------------------------------------------------------------------------------------------------|------------------------------|
| <b>Results</b>           |                |                                                                                                                                                                                                             |                              |
| Descriptive data         | 14*            | (a) Give characteristics of study participants (eg demographic, clinical, social) and information on exposures and potential confounders                                                                    | 6                            |
|                          |                | (b) Indicate number of participants with missing data for each variable of interest                                                                                                                         | 6, Table: 1                  |
| Outcome data             | 15*            | Report numbers of outcome events or summary measures                                                                                                                                                        | 6, 7<br>Table: 2-3           |
| Main results             | 16             | (a) Give unadjusted estimates and, if applicable, confounder-adjusted estimates and their precision (eg 95% confidence interval). Make clear which confounders were adjusted for and why they were included | 6, 7<br>Table: 2-3           |
|                          |                | (b) Report category boundaries when continuous variables were categorized                                                                                                                                   | 6, 7<br>Table: 2-3           |
|                          |                | (c) If relevant, consider translating estimates of relative risk into absolute risk for a meaningful time period                                                                                            | 7                            |
| Other analyses           | 17             | Report other analyses done—eg analyses of subgroups and interactions, and sensitivity analyses                                                                                                              | 8,<br>Table S3-S6, Figure S2 |
| <b>Discussion</b>        |                |                                                                                                                                                                                                             |                              |
| Key results              | 18             | Summarize key results with reference to study objectives                                                                                                                                                    | 8                            |
| Limitations              | 19             | Discussion limitations of the study, taking into account sources of potential bias or imprecision. Discussion both direction and magnitude of any potential bias                                            | 11, 12                       |
| Interpretation           | 20             | Give a cautions overall interpretation of results considering objectives, limitations, multiplicity of analyses, results from similar studies, and other relevant evidence                                  | 8-11                         |
| Generalizability         | 21             | Discuss the generalizability (external validity) of the study results                                                                                                                                       | 11, 12                       |
| <b>Other information</b> |                |                                                                                                                                                                                                             |                              |
| Funding                  | 22             | Give the source of funding and the role of the funders for the present study and, if applicable, for the original study on which the present article is based                                               | 24                           |

\*Give information separately for exposed and unexposed groups
